# Supplementary material for: Lytic Promoters Express Protein during Herpes Simplex Virus Latency
Source: PubMed Central journal article supplement (PMC4922595; doi:10.1371/journal.ppat.1005729), 2016-06-27
Supplement: ppat.1005729.s003.pdf [file ppat.1005729.s003.pdf]

**S3 Fig.  $\beta$ -gal expression is not detectable in ROSA26 mice latently infected with a *cre* null HSV-1 virus.**

Groups of 5 ROSA26 mice were infected with either HSV-1 pICP47\_eGC (Cre<sup>+</sup>) or HSV-1 pICP47/Tdtom (Cre<sup>-</sup>) and after 20 days the expression of  $\beta$ -gal in their DRG was determined. (A) Representative photomicrographs of DRG at spinal levels T11, T10 and T9 of a single mouse for each virus taken at 40 $\times$  magnification (scale bar = 300  $\mu$ m, as indicated on top left image). (B) The total number of  $\beta$ -gal<sup>+</sup> cells per mouse, with the results of two independent experiments pooled. Each point representing a single mouse and the bar represents the mean cell count ( $n = 10$  per virus).
