# Supplementary material for: Lytic Promoters Express Protein during Herpes Simplex Virus Latency
Source: PubMed Central journal article supplement (PMC4922595; doi:10.1371/journal.ppat.1005729), 2016-06-27
Supplement: ppat.1005729.s005.pdf [file ppat.1005729.s005.pdf]

**S5 Fig. The promoter for ICP47 drives the expected pattern of conventional fluorescent reporter expression during HSV infection.**

Groups of C57Bl/6 mice were infected with HSV-1 pICP47\_eGC by tattoo on the flank and were culled at various times p.i. and the number of eGFP<sup>+</sup> cells in each DRG was determined. (A) Representative photomicrographs of DRG at T10 of a single mouse taken at 4 days p.i. and at T11 of another mouse taken at 7 days p.i. at 50× magnification (top; scale bar = 250 μm) and 100× magnification (bottom; scale bar = 100 μm). (B) The total number of eGFP<sup>+</sup> cells per mouse and (C) the spread of virus as indicated by the number of DRG containing at least one eGFP<sup>+</sup> cell. Each point represents a single mouse and the bar represents the mean cell count. The results were pooled from two independent experiments ( $n = 8$  for each time point) and differences between groups were assessed using a Kruskal Wallis test with Dunn's posttest for pairwise comparisons ( $***p < 0.001$ ). Groups of C57Bl/6 mice were infected with HSV-1 pICP47/Tdtom by tattoo on the flank and were culled at various times p.i. and the number of Tdtomato<sup>+</sup> cells in each DRG was determined. (D) Representative photographs of DRG at T10 of a single mouse taken at 4 or 7 days p.i. at 50× magnification (top; scale bar = 250 μm) and 100× magnification (bottom; scale bar = 100 μm). (E) The total number of Tdtomato<sup>+</sup> cells per mouse and (F) the spread of virus as indicated by the number of DRG containing at least one Tdtomato<sup>+</sup> cell. Each point represents a single mouse and the bar represents the mean cell count. The results are pooled from two independent experiments ( $n = 7 - 8$  for each time point) and the differences between the groups were assessed using a Kruskal Wallis test with Dunn's posttest for pairwise comparisons ( $*p < 0.05$ ,  $**p < 0.01$ ,  $***p < 0.001$ ).
